# Supplementary material for: Cellular localization of long non-coding RNAs affects silencing by RNAi more than by antisense oligonucleotides
Source: PubMed Central journal article supplement (PMC4737147; doi:10.1093/nar/gkv1206), 2015-11-17
Supplement: supp_gkv1206_nar-01025-y-2015-File009.pdf [file supp_gkv1206_nar-01025-y-2015-File009.pdf]

## Supplemental Figures:

Figure S1

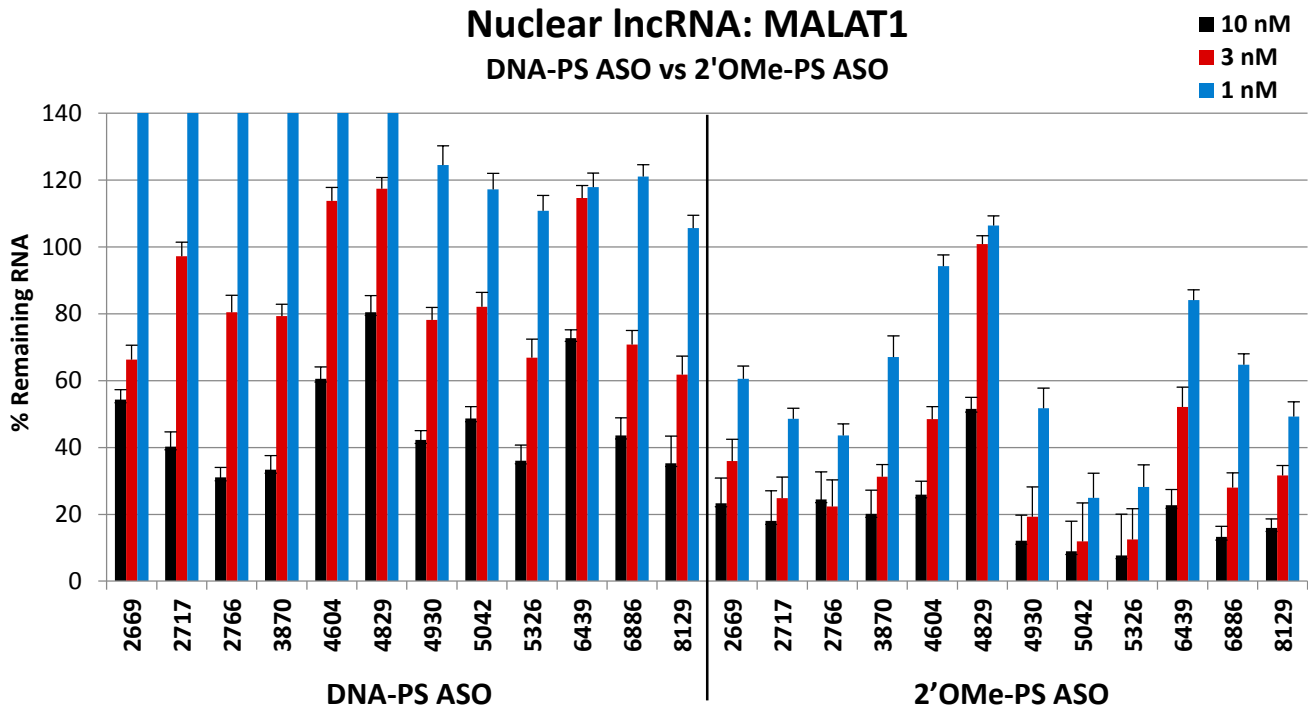

**Figure S1: Potency comparison between DNA-PS and 2'OMe-PS ASOs for MALAT1.**

DNA-PS or 2'OMe-PS ASOs at the same sites targeting MALAT1 were transfected in triplicate into HeLa cells with Lipofectamine® 2000, and RNA levels were measured by RT-qPCR 24 hrs later. Data shows an average of two or more experiments (e.g., at least 6 independent transfections). LncRNA levels were calculated using the internal reference genes HPRT and SFRS9, and compared against HeLa cells transfected with 2-3 negative control genes containing the same chemical modifications at the same dose. Site locations in the target are indicated on the x-axis, and organized 5' to 3' along each target for each class of knockdown reagents.

Figure S2

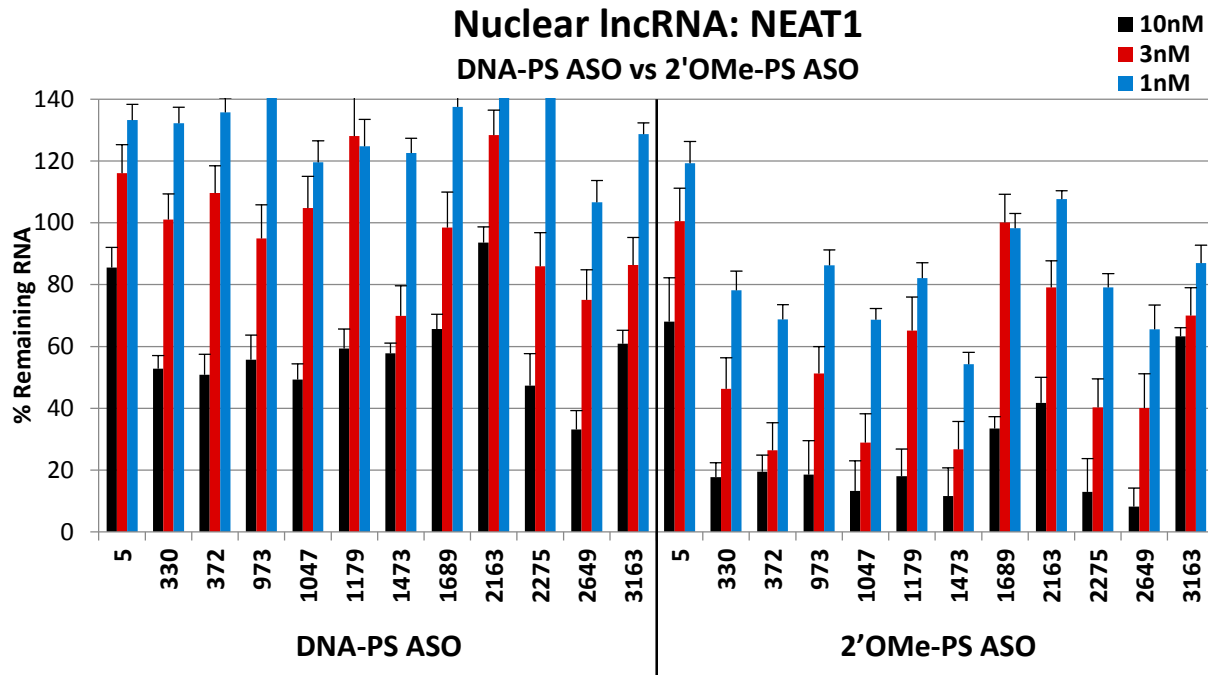

**Figure S2: Potency comparison between DNA-PS and 2'OMe-PS ASOs for NEAT1.**

DNA-PS or 2'OMe-PS ASOs at the same sites targeting NEAT1 were transfected in triplicate into HeLa cells with Lipofectamine® 2000, and RNA levels were measured by RT-qPCR 24 hrs later. Data shows an average of two or more experiments (e.g., at least 6 independent transfections). LncRNA levels were calculated using the internal reference genes HPRT and SFRS9, and compared against HeLa cells transfected with 2-3 negative control sequences containing the same chemical modifications at the same dose. Site locations in the target are indicated on the x-axis, and organized 5' to 3' along each target for each class of knockdown reagents.

Figure S3

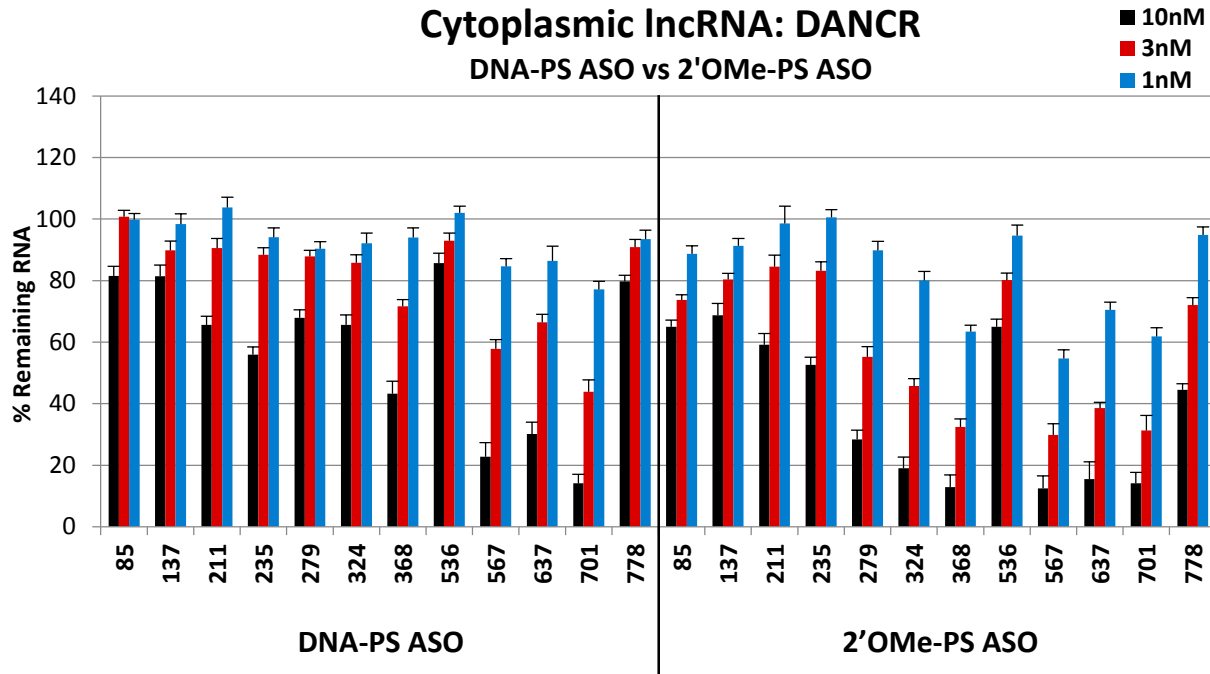

**Figure S3: Potency comparison between DNA-PS and 2'OMe-PS ASOs for DANCR.**

DNA-PS or 2'OMe-PS ASOs at the same sites targeting DANCR were transfected in triplicate into HeLa cells with Lipofectamine® 2000, and RNA levels were measured by RT-qPCR 24 hrs later. Data shows an average of two or more experiments (e.g., at least 6 independent transfections). LncRNA levels were calculated using the internal reference genes HPRT and SFRS9, and compared against HeLa cells transfected with 2-3 negative control sequences containing the same chemical modifications at the same dose. Site locations in the target are indicated on the x-axis, and organized 5' to 3' along each target for each class of knockdown reagents.

Figure S4

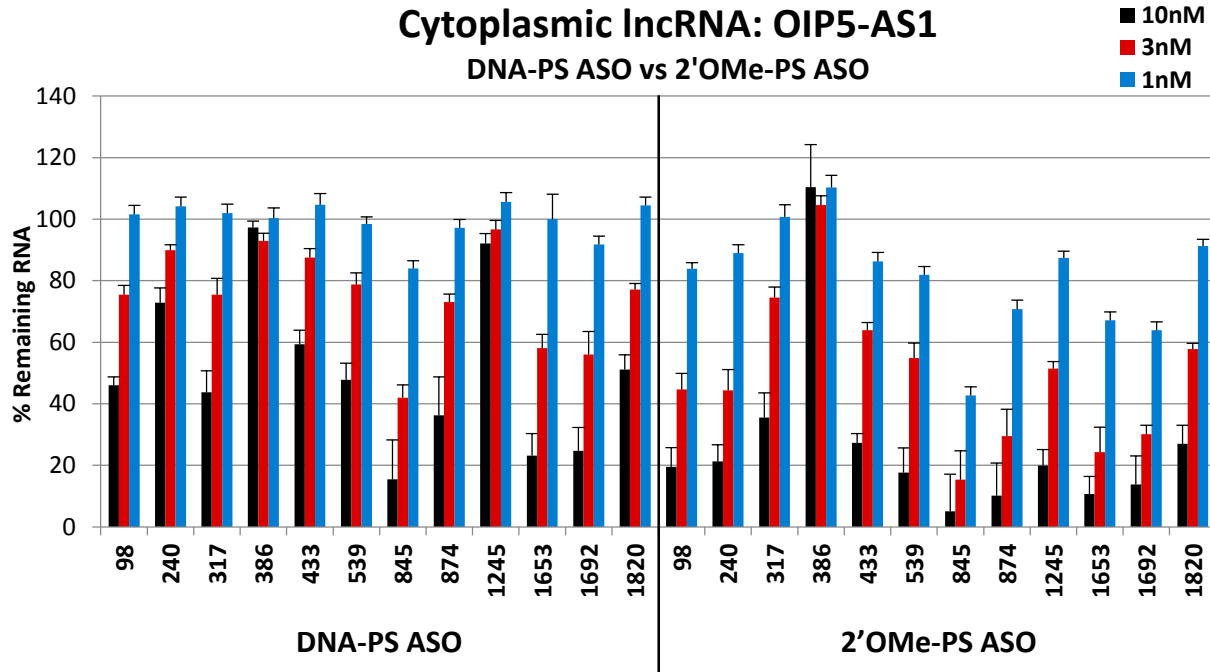

**Figure S4: Potency comparison between DNA-PS and 2'OMe-PS ASOs for OIP5-AS1.**

DNA-PS or 2'OMe-PS ASOs at the same sites targeting OIP5-AS1 were transfected in triplicate into HeLa cells with Lipofectamine® 2000, and RNA levels were measured by RT-qPCR 24 hrs later. Data shows an average of two or more experiments (e.g., at least 6 independent transfections). LncRNA levels were calculated using the internal reference genes HPRT and SFRS9, and compared against HeLa cells transfected with 2-3 negative control sequences containing the same chemical modifications at the same dose. Site locations in the target are indicated on the x-axis, and organized 5' to 3' along each target for each class of knockdown reagents.

Figure S5

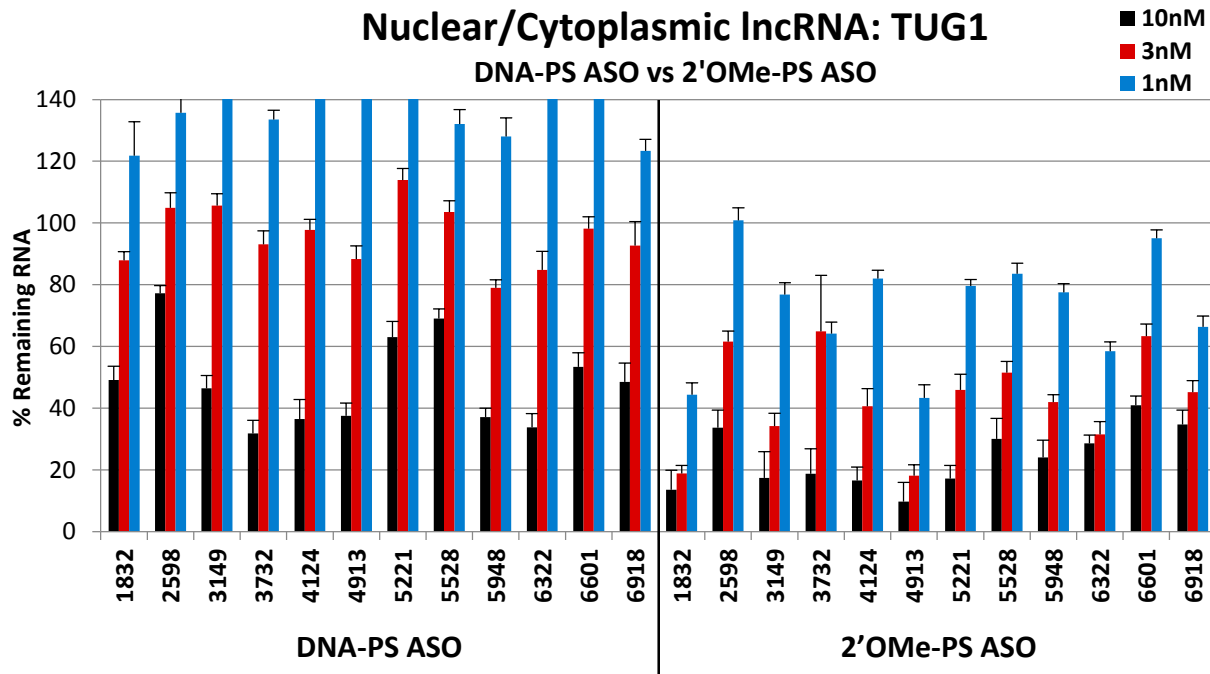

**Figure S5: Potency comparison between DNA-PS and 2'OMe-PS ASOs for TUG1.**

DNA-PS or 2'OMe-PS ASOs at the same sites targeting TUG1 were transfected in triplicate into HeLa cells with Lipofectamine® 2000, and RNA levels were measured by RT-qPCR 24 hrs later. Data shows an average of two or more experiments (e.g., at least 6 independent transfections). LncRNA levels were calculated using the internal reference genes HPRT and SFRS9, and compared against HeLa cells transfected with 2-3 negative control sequences containing the same chemical modifications at the same dose. Site locations in the target are indicated on the x-axis, and organized 5' to 3' along each target for each class of knockdown reagents.

Figure S6

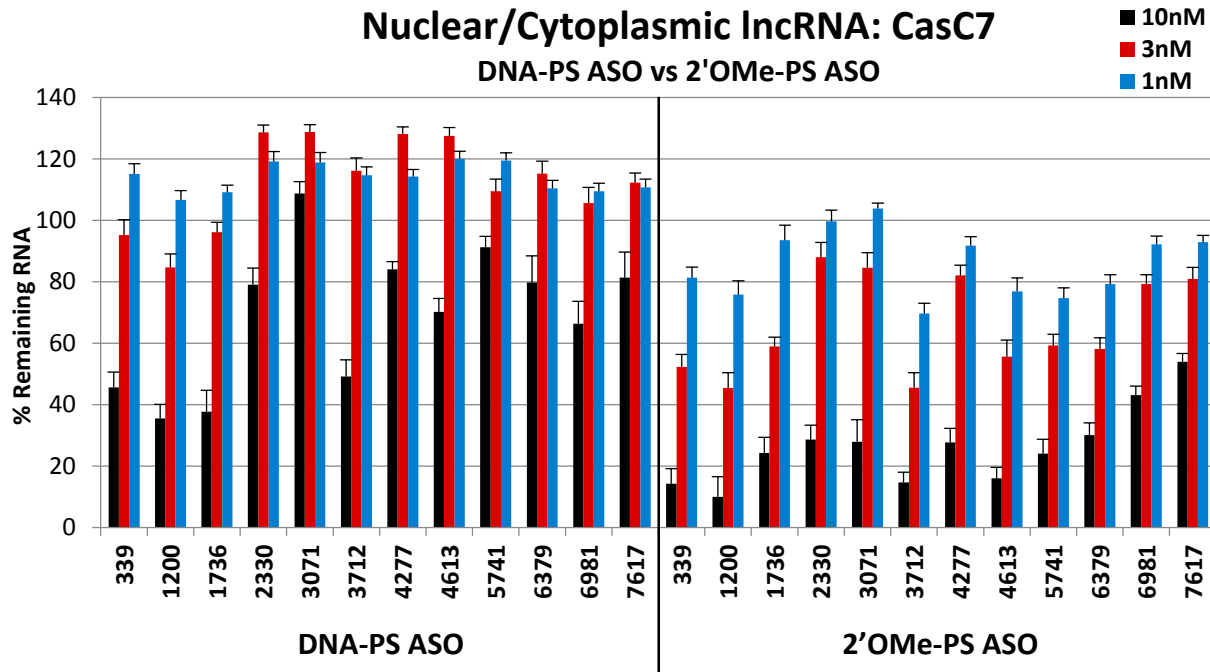

**Figure S6: Potency comparison between DNA-PS and 2'OMe-PS ASOs for CasC7.**

DNA-PS or 2'OMe-PS ASOs at the same sites targeting CasC7 were transfected in triplicate into HeLa cells with Lipofectamine® 2000, and RNA levels were measured by RT-qPCR 24 hrs later. Data shows an average of two or more experiments (e.g., at least 6 independent transfections). LncRNA levels were calculated using the internal reference genes HPRT and SFRS9, and compared against HeLa cells transfected with 2-3 negative control sequences containing the same chemical modifications at the same dose. Site locations in the target are indicated on the x-axis, and organized 5' to 3' along each target for each class of knockdown reagents.

Figure S7

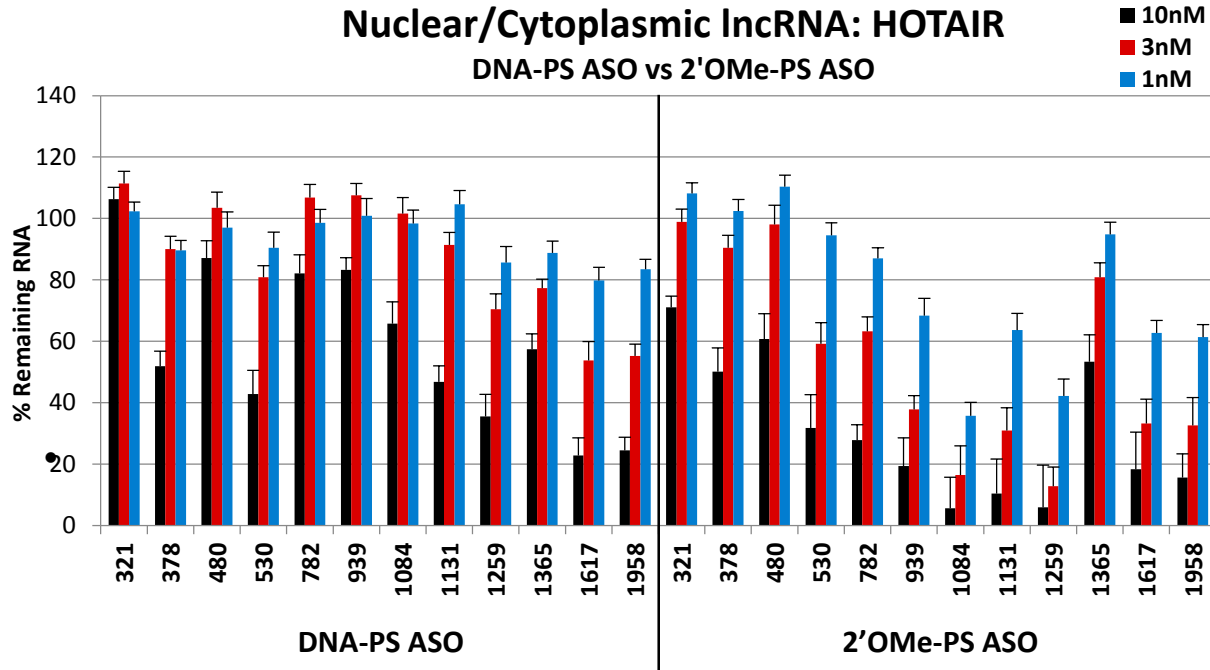

**Figure S7: Potency comparison between DNA-PS and 2'OMe-PS ASOs for HOTAIR.**

DNA-PS or 2'OMe-PS ASOs at the same sites targeting HOTAIR were transfected in triplicate into HeLa cells with Lipofectamine® 2000, and RNA levels were measured by RT-qPCR 24 hrs later. Data shows an average of two or more experiments (e.g., at least 6 independent transfections). LncRNA levels were calculated using the internal reference genes HPRT and SFRS9, and compared against HeLa cells transfected with 2-3 negative control sequences containing the same chemical modifications at the same dose. Site locations in the target are indicated on the x-axis, and organized 5' to 3' along each target for each class of knockdown reagents.

Figure S8

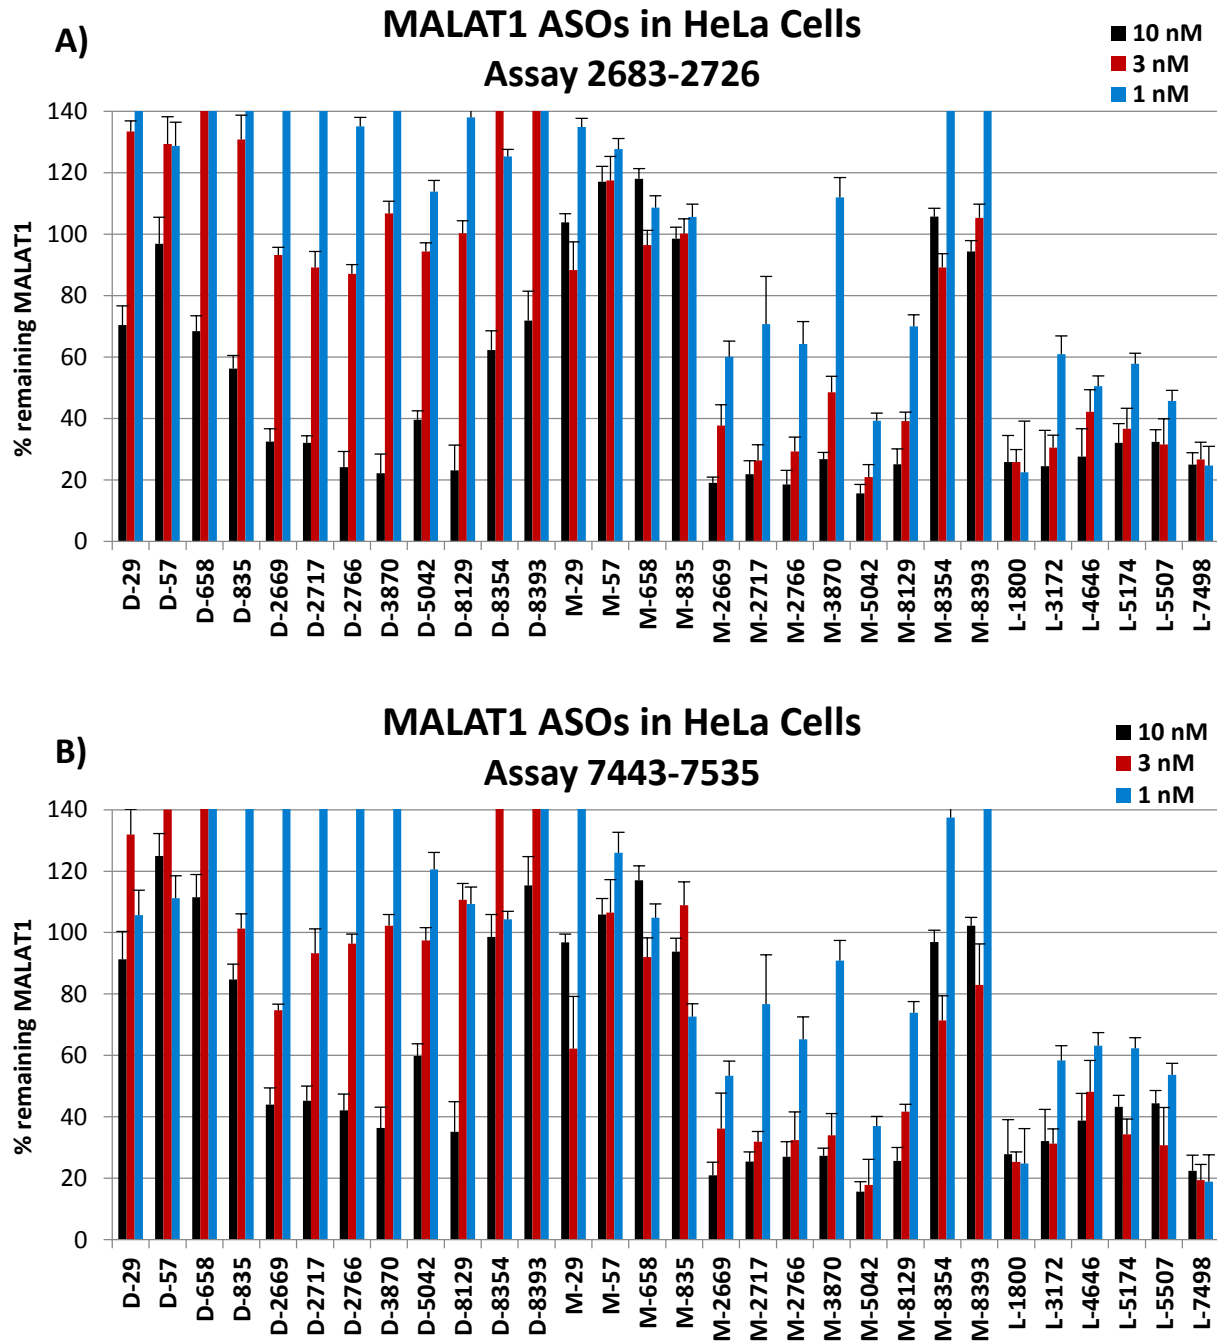

**Figure S8: An example of qPCR 5' and 3' assay concordance.**

ASOs targeting MALAT1 were transfected in triplicate into HeLa cells with Lipofectamine® 2000, and RNA levels were measured by RT-qPCR 24 hrs later by multiplexing A) a qPCR assay positioned at 2683-2726 and B) a qPCR assay positioned at 7443-7535. LncRNA levels were calculated using the internal reference genes HPRT and SFRS9, and compared against HeLa cells transfected with 2-3 negative control sequences containing the same chemical modifications at the same dose. Site locations in the target are indicated on the x-axis, and organized 5' to 3' along each target for each class of knockdown reagents. D = DNA-PS, M = 2'OMe-PS gapmer and L = LNA-PS gapmer.



**Figure S9**

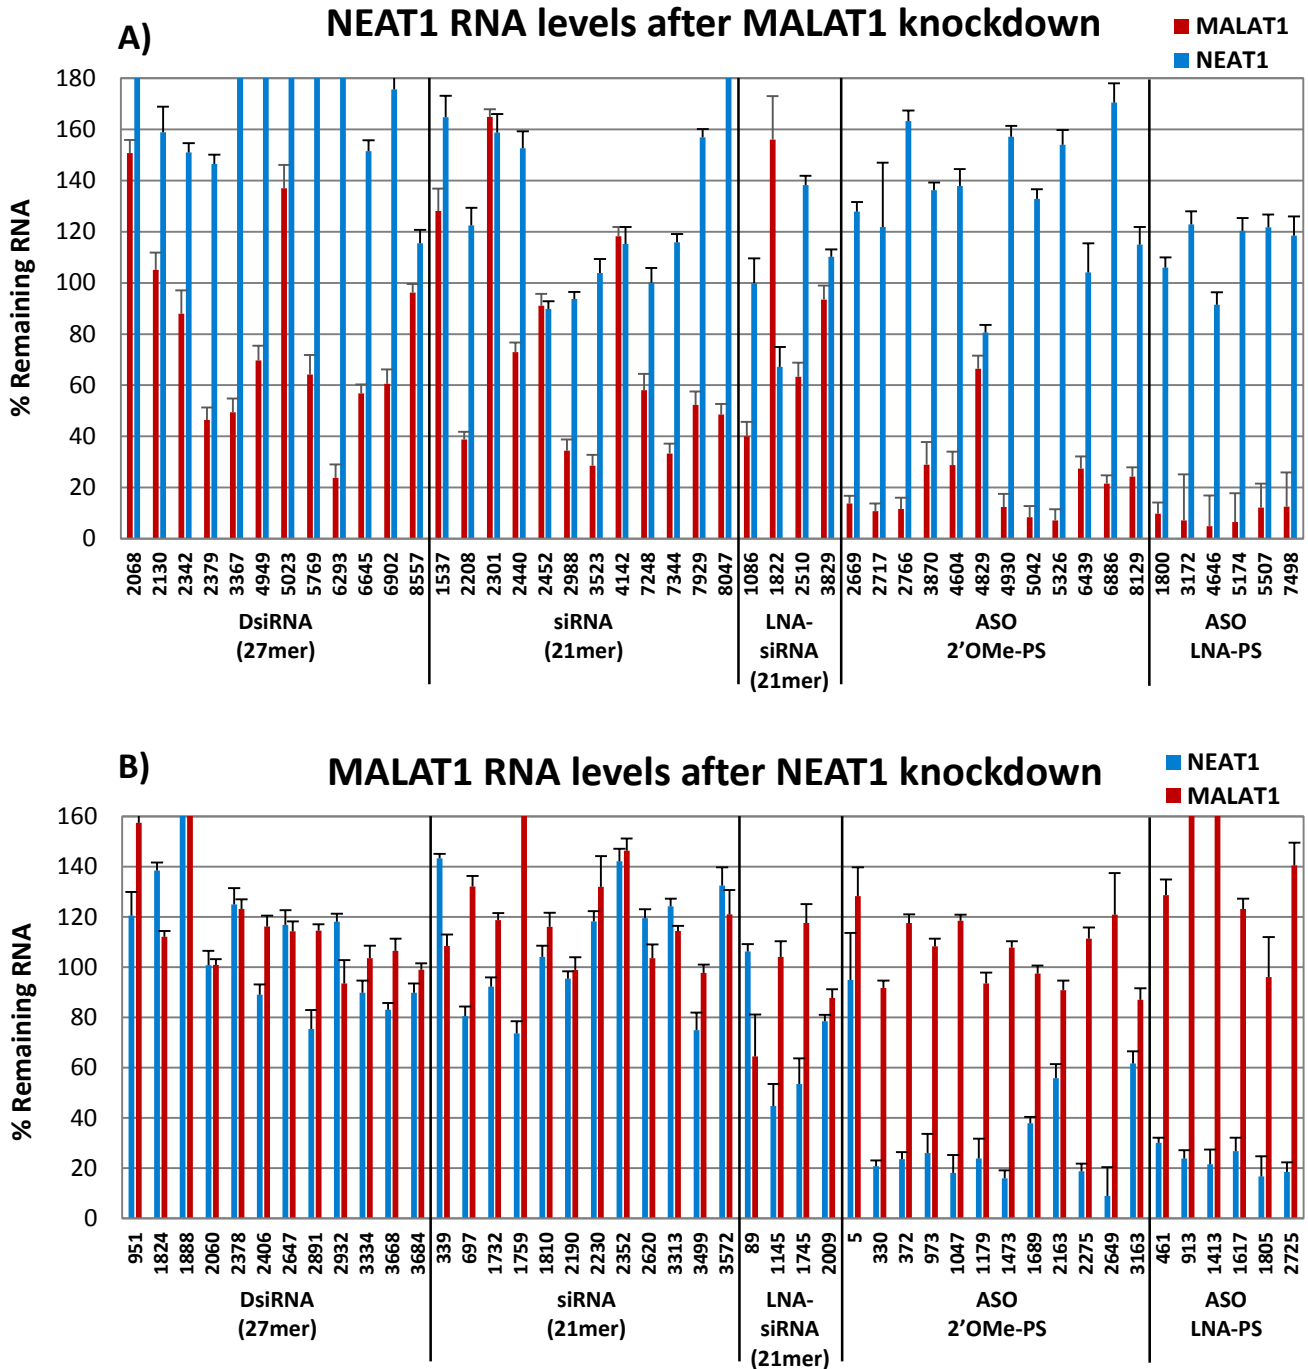

**Figure S9: Specificity of MALAT1 and NEAT1 knockdown.**

DsiRNAs, siRNAs and ASOs targeting A) MALAT1 or B) NEAT1 were transfected in triplicate into HeLa cells with Lipofectamine® 2000, and RNA levels were measured by RT-qPCR 24 hrs later. Data shown represent an average of triplicate transfections. MALAT1 and NEAT1 levels were calculated using the internal reference genes HPRT and SFRS9, and compared with HeLa cells transfected with 2-3 negative control sequences containing the same chemical modifications at the same doses. Site locations of the knockdown reagents are indicated on the x-axis and are organized 5' to 3' along each target for each class of knockdown reagent.

Figure S10

A)

| lncRNA   | ASO #1 site   | ASO #2 site   | DsiRNA site | siRNA site |
|----------|---------------|---------------|-------------|------------|
| MALAT1   | 2'OMe-PS 3870 | 2'OMe-PS 2766 | DsiRNA 4949 | siRNA 2988 |
| OIP5-AS1 | 2'OMe-PS 874  | 2'OMe-PS 1653 | DsiRNA 732  | siRNA 665  |
| CasC7    | 2'OMe-PS 1200 | 2'OMe-PS 3713 | DsiRNA 1341 | siRNA 5946 |

B) **A combinatorial approach can improve knockdown**

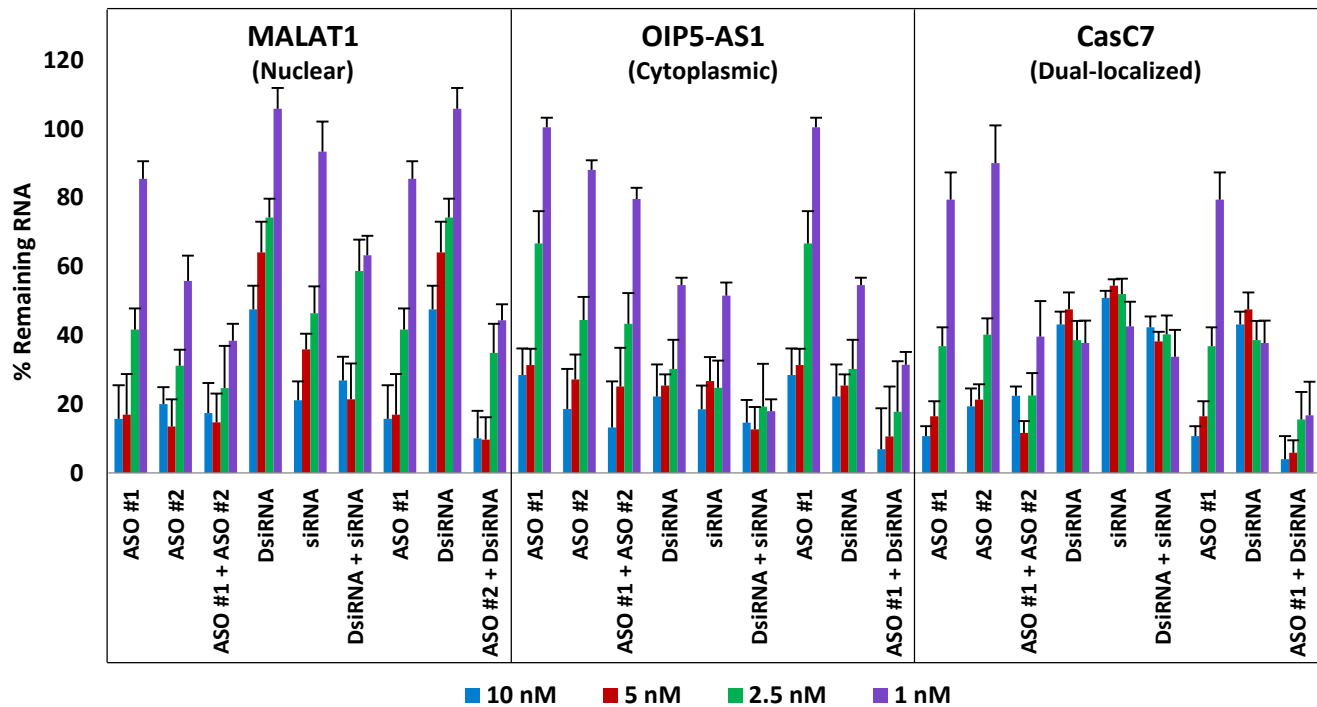

**Figure S10: A combinatorial approach can improve knockdown.**

2'OMe-PS ASOs, DsiRNAs and siRNAs were transfected alone or cotransfected in combination with another knockdown reagent. A) Target site locations of each knockdown reagent. B) Transfections were performed in triplicate into HeLa cells with Lipofectamine® 2000, and RNA levels were measured by RT-qPCR 24 hrs later. LncRNA levels were calculated using the internal reference genes HPRT and SFRS9, and compared against HeLa cells transfected with 2-3 negative control sequences at the same total dose.

Figure S11

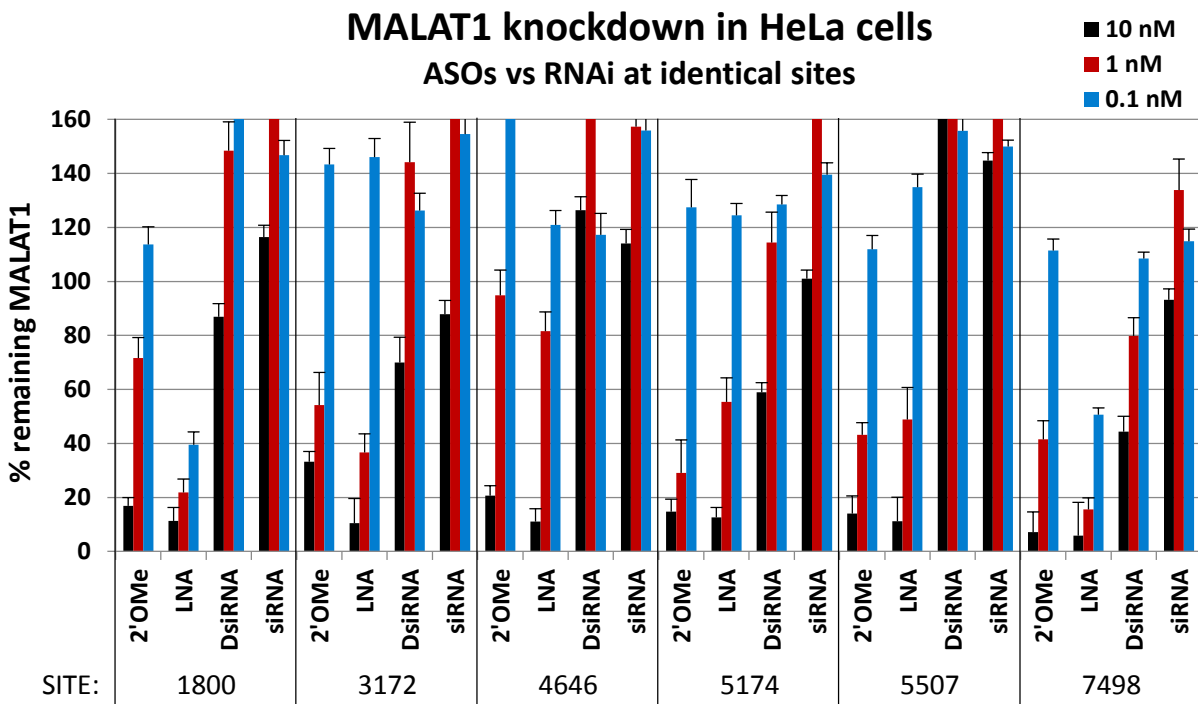

**Figure S11: Potency comparison between ASOs and RNAi reagents targeting MALAT1 at identical sites.**

2'OMe-PS gapmer and LNA-PS gapmer ASOs were compared with DsiRNAs and siRNAs for potency at the same sites targeting MALAT1. All knockdown reagents were transfected in triplicate into HeLa cells with Lipofectamine® 2000, and RNA levels were measured by RT-qPCR 24 hrs later. LncRNA levels were calculated using the internal reference genes HPRT and SFRS9, and compared against HeLa cells transfected with 2-3 negative control sequences containing the same chemical modifications at the same dose. Site locations in the target are indicated on the x-axis.

## Supplemental Table 2

| Target    | Localization | Reagent           | IC50 (nM)     |               |
|-----------|--------------|-------------------|---------------|---------------|
|           |              |                   | HeLa          | HCT116        |
| MALAT1    | nuclear      | DsiRNA-6928       | 18.49         | 18.66         |
| MALAT1    | nuclear      | siRNA-2988        | 1.26          | 1.59          |
| MALAT1    | nuclear      | 2OMe ASO-5042     | 0.24          | 0.44          |
| MALAT1    | nuclear      | LNA ASO-1800      | 0.04          | 0.02          |
| NEAT1     | nuclear      | LNA siRNA-1745    | Indeterminate | Indeterminate |
| NEAT1     | nuclear      | siRNA-3499        | Indeterminate | Indeterminate |
| NEAT1     | nuclear      | 2OMe ASO-1473     | 2.66          | 2.74          |
| NEAT1     | nuclear      | LNA ASO-1805      | 1.42          | 1.87          |
| DANCR     | cytoplasmic  | DsiRNA-665        | 0.01          | 0.02          |
| DANCR     | cytoplasmic  | siRNA-679         | 0.002         | 0.01          |
| DANCR     | cytoplasmic  | 2OMe ASO-567      | 0.97          | 3.13          |
| DANCR     | cytoplasmic  | LNA ASO-703       | 0.21          | 0.43          |
| OIP5-AS1  | cytoplasmic  | DsiRNA-1419       | 0.04          | 0.02          |
| OIP5-AS1  | cytoplasmic  | siRNA-1756        | 0.02          | 0.02          |
| OIP5-AS1  | cytoplasmic  | 2OMe ASO-845      | 1.70          | 1.49          |
| OIP5-AS1  | cytoplasmic  | LNA ASO-1367      | 0.96          | 0.88          |
| TUG1      | mixed        | DsiRNA-1724       | 0.28          | 1.67          |
| TUG1      | mixed        | siRNA-1700        | 0.98          | 6.10          |
| TUG1      | mixed        | 2OMe ASO-4913     | 1.41          | 2.26          |
| TUG1      | mixed        | LNA ASO-5140      | 0.63          | 0.75          |
| CasC7     | mixed        | DsiRNA 5852       | 0.08          | 0.14          |
| CasC7     | mixed        | LNA siRNA-775     | 0.02          | 0.04          |
| CasC7     | mixed        | 2OMe ASO-3713     | 1.19          | 2.14          |
| CasC7     | mixed        | LNA ASO-910       | 0.45          | 0.86          |
| HPRT mRNA | mixed        | DsiRNA Pos Cont   | 0.07          | 0.05          |
| HPRT mRNA | mixed        | 2OMe ASO Pos Cont | 1.93          | 2.19          |

IC50 values calculated from 9 doses in HeLa and HCT116 cells with GraphPad Prism® 6.0 software using the non-linear regression formula: log (inhibitor) versus normalized response – variable slope. IC50 values indicated as “indeterminate” indicate reagents in which potency levels were too low for calculations.
